**Title:** The Genome of the Mustard Hill Coral, *Porites astreoides*

**Authors:** Wong, Kevin H.<sup>1\*</sup> & Putnam, Hollie M.<sup>1\*</sup>

**Affiliations:** <sup>1</sup>University of Rhode Island, Department of Biological Sciences

**Corresponding Authors:** \*kevin\_wong1@uri.edu; hputnam@uri.edu

## Abstract

Coral reefs are threatened both locally and globally by anthropogenic impacts, which to date have contributed to substantial declines in coral cover worldwide. However, some corals are more resilient to these environmental changes and therefore have increased relative abundance on local scales and may represent prominent members shaping future reef communities. Here, we provide the first draft reference genome for one such reef-building coral, the mustard hill coral, *Porites astreoides*. This reference genome was generated from a sample collected in Bermuda, with DNA sequenced via Pacific Biosciences HiFi long-read technology to provide an initial draft reference genome assembly. Assembly of the PacBio reads with FALCON UnZip resulted in a 678 Mbp assembly with 3,051 contigs with an N50 of 412,256. The genome BUSCO completeness analysis resulted in 90.9% of the metazoan gene set. An *ab initio* transcriptome was also produced with 64,636 gene models with a transcriptome BUSCO completeness analysis of 77.5% when compared to the metazoan gene set. The function annotation was obtained through a hierarchical approach of SwissProt, TrEMBL, and NCBI nr database of which 86.6% of proteins were annotated. Through our *ab initio* gene prediction for structural annotation and generation of a functional annotation for the *P. astreoides* draft genome assembly, we provide valuable resources for improving biological knowledge, which can facilitate comparative genomic analyses for corals, and enhance our capacity to test for the molecular underpinnings of adaptation and acclimatization to support evidence-based restoration and human assisted evolution of corals.

## Classifications:

Genetics and Genomics; Animal Genetics; Marine Biology

## **Data Description**

### **Context**

Coral reef ecosystems provide disproportionately large economic, scientific, and cultural value for their global footprint. These ecosystem engineers build coral skeletons that are home to a variety of marine life. This engineering capacity is due to the nutritional symbiosis between the coral host and their dinoflagellate algal symbionts, Symbiodinaceae (LaJeunesse et al. 2018), which provides excess carbon to fuel coral metabolic processes (Muscatine and Cernichiaro 1969) and stimulate growth of the 3D skeletal structure. Under thermal stress as little as 1°C above local summer maxima there is a breakdown in the symbiosis of corals and Symbiodinaceae (Coles and Brown 2003), which can result in mass mortality that can reshape reef communities (Hughes et al. 2021).

In the face of rapid climate change, reef-building corals have been under unprecedented stress resulting in global population declines of these fundamental species (Hughes et al. 2018). While some species are sensitive to climate change (i.e., ecological losers), others are more resistant or resilient under a rapidly changing environment (i.e., ecological "winners") (Loya et al. 2001). These taxa are often able to grow and reproduce in a "weedy" fashion, and thus increase in relative abundance on the reef (Darling et al. 2012). One such weedy coral species is the mustard hill coral, *Porites astreoides* (Lamarck, 1826), which is a ubiquitous shallow Western Atlantic coral that is present across large environmental clines from mesophotic depths of ~45m (Goodbody-Gringley et al. 2021) to shallow mangrove environments (Lord et al. 2021) and a latitudinal range from Brazil (Pereira et al. 2017) to Bermuda (Dodge, Logan, and Antonius 1982). In contrast to other Caribbean corals, *P. astreoides* has increased in abundance in recent years, with high juvenile (Vermeij et al. 2011) and adult (Green, Edmunds, and

Carpenter 2008; Toth et al. 2019; Eagleson et al. 2021) abundances, but smaller colony sizes (Edmunds, Didden, and Frank 2021). *P. astreoides* is considered a “weedy species” as it is a hermaphroditic, brooding coral species that has a prolonged planulation period (Chornesky and Peters 1987; McGuire 1998) with pelagic larvae that exhibit high phenotypic plasticity (de Putron and Smith 2011; de Putron et al. 2017; Goodbody-Gringley et al. 2018; Zhang et al. 2019; Wong et al. 2021) and high recruitment rates (Goodbody-Gringley et al. 2018, 2021). Additionally, larvae and juvenile life stages have been well studied under ocean acidification (Albright, Mason, and Langdon 2008; de Putron et al. 2011) and temperature stress condition (Edmunds, Gates, and Gleason 2001; Edmunds et al. 2005; Ross et al. 2013; Olsen et al. 2013; Zhang et al. 2019) due to the ease of brooded larval collection. Adult colonies also display phenotypic plasticity in response to different reef environments (Elizalde-Rendón et al. 2010; Kenkel et al. 2013; Kenkel, Meyer, and Matz 2013; Haslun et al. 2018; Walker et al. 2019; Lenz et al. 2021; Lord et al. 2021; Wong et al. 2021) and recovery from thermal bleaching events (Kenkel et al. 2013; Kenkel, Meyer, and Matz 2013; Grottoli et al. 2014; Schoepf et al. 2015; Kenkel, Setta, and Matz 2015; Levas et al. 2018; Wong et al. 2021; Bove et al. 2019; Chapron et al. 2022).

As 'omics approaches have emerged, there has been an increase in the study of *P. astreoides* for genetic connectivity and population structure (Serrano et al. 2016; Gallery et al. 2021; Riquet et al. 2022), microbiome community (Wegley et al. 2007; Thurber et al. 2012; Sharp, Distel, and Paul 2012; Meyer, Paul, and Teplitski 2014; Glasl, Herndl, and Frade 2016; Fuess et al. 2017; Meiling et al. 2021; Dunphy, Vollmer, and Gouhier 2021), Symbiodinaceae community (Reich, Robertson, and Goodbody-Gringley 2017; Serrano et al. 2016; Salas et al. 2017), gene expression (Kenkel, Meyer, and Matz 2013; Fuess et al. 2017; Walker et al. 2019;

Mansour et al. 2016), and epigenetics (Dimond and Roberts 2020). Although three *de novo* transcriptome assemblies are available for this species (Kenkel, Meyer, and Matz 2013; Mansour et al. 2016; Walker et al. 2019) they have relatively low coverage of the anticipated gene repertoire (e.g., BUSCO scores are only 18.1-26.5% complete with respect to the single copy metazoan reference gene set). Therefore, the field is currently limited by the lack of an available reference genome and improved transcriptome. These resources would greatly enhance studies that are reliant on a reference genome, for example Whole Genome Bisulfite Sequencing and Genome-Wide Association Studies. Our study is the first to generate a publicly available, assembled, and structurally and functionally annotated reference genome of *P. astreoides*, in addition to an improved reference transcriptome.

## Methods

### *Coral collection, treatment, and sampling*

One adult *P. astreoides* colony (Figure 1A) was collected on June 12, 2017 from Bailey's Bay Reef Flats (32°22'27"N, 64°44'37"W) in Bermuda, transported to the Bermuda Institute of Ocean Sciences. The colony was fragmented into genetic replicates using a drill and 3.5 cm diameter size hole saw to generate circular cores of tissue and skeleton (Figure 1B). Replicate fragments were affixed to plugs using underwater epoxy (HoldFast Epoxy Stick, Instant Ocean), which covered all of the skeletal surface. The replicates fragments were held in indoor tanks with flowing seawater with LED lights (Arctic- T247 Aquarium LED, Ocean Revive) under ambient conditions for 14 days (28°C with 12:12hr light cycle at ~115  $\mu\text{mol photons}$ ) and then exposed to either ambient or heated conditions (31°C with 12:12hr light cycle at ~115  $\mu\text{mol photons}$ ). These conditions were applied for 59 days in order to reduce the concentration of endosymbiotic

dinoflagellates (Symbiodiniaceae) and thereby to enrich for host DNA for downstream DNA extraction and sequencing. Coral fragments were immediately snap frozen in liquid nitrogen and stored at -80°C on August 28, 2017. An additional four fragments were sampled for RNA sequencing. Of these fragments, two were fragments under ambient conditions, one fragment that experienced the 59 day thermal stress with an additional hyposalinity stress (approx. 18 psu) 30 minutes before snap freezing, and one fragment under ambient conditions from a different *P. astreoides* colony from the same reef site.

#### *Extraction of Genomic DNA*

The frozen coral samples were homogenized with a mortar and pestle and liquid nitrogen. Coral high molecular weight genomic DNA (gDNA) was extracted using the QIAGEN Genomic-tip 100/G (Cat #10223), the QIAGEN Genomic DNA Buffer Set (Cat #19060), QIAGEN RNase A (100mg/mL concentration; Cat #19101), QIAGEN Proteinase K (Cat #19131), and DNA lo-bind tubes (Eppendorf Cat #022431021) according to the manufacturer's instructions for preparation of tissue samples in the QIAGEN Genomic DNA Handbook (version 06/2015) using 5 individual sample preps of the same homogenized material to maximize yield. gDNA concentration was quantified using the Qubit DNA Broad Range kit (Invitrogen, Cat #Q32850) and DNA integrity was measured using a Genomic D5000 Screentape on an Agilent TapeStation 4200 system (Figure 2).

#### *DNA Sequencing Library, Read filtering, and Genome Assembly*

gDNA was sent to Genewiz (Azenta Life Sciences) for library preparation and sequencing using PacBio Sequel I long read technology. A single SMRTbell sequencing library

(double-stranded DNA template with hairpins at each end) was constructed. Briefly, the DNA was fragmented by shearing, and DNA damage within the strand and at the ends of the fragments was repaired and the sample purified with AMPure PB beads. Hairpin adapters were then ligated to the DNA fragment ends and the sample again purified with AMPure PB beads. Sequencing primers were then annealed to form polymerase-primer complexes and the resulting library was sequenced using 4 SMRT cells on the PacBio Sequel I at GeneWiz (Table 1).

Prior to assembly, reads were mapped to the *Porites lutea* genome (Robbins et al. 2019) with MiniMap v2 (Li 2018) and SAMtools v1.9 (Li et al. 2009) to exclude non-coral reads. The filtered reads were assembled with Falcon v2.2.4 (Chin et al. 2016) at Genewiz. To assess genome assembly completeness, the *P. astreoides*, *Porites rus* (Celis et al. 2018), *P. lutea* (Robbins et al. 2019), and *Porites australiensis* (Shinzato et al. 2021) genomes were searched against 954 universal metazoan single-copy orthologs in the metazoa\_odb10 gene set using BUSCO v5.2.2 in "genome" mode (Simão et al. 2015) (Table 2).

### *Structural and Functional Annotation*

Structural annotation of the *P. astreoides* genome was completed on the University of Rhode Island High Performance Computer "Andromeda". As input for MAKER v3.01.03 (Cantarel et al. 2008) we used an existing *P. astreoides* transcriptome from samples collected in the Florida Keys, USA (Kenkel, Meyer, and Matz 2013) and existing congener *P. lutea* peptide sequences from a sample collected in Australia (Robbins et al. 2019). These files were used as input for an initial round of MAKER to predict gene models directly from this transcriptomic and protein data, respectively. The first round of MAKER included RepeatMasker (Chen 2004). The output from the initial MAKER round was used to train *ab initio* gene predictors SNAP

(Korf 2004) and AUGUSTUS (Stanke et al. 2006) using BUSCO v5.2.2 (Simão et al. 2015). A second round of MAKER was performed using the GFF output of the first round containing the information on the locations of repetitive elements for masking, as well as the locations of ESTs and proteins and *ab initio* gene prediction from the SNAP and AUGUSTUS outputs. Another round of *ab initio* gene prediction was performed on the output from the second round of MAKER. A third and final round of MAKER was conducted including training information from the GFF files generated from the second round of MAKER and *ab initio* gene prediction as input. Genome structural annotations were compared against all four *Porites* congeners using AGAT v0.8.1 (Table 2).

The *ab initio* transcriptome generated from the final round of MAKER was compared against other *de novo* *P. astreiodes* transcriptome assemblies (Kenkel, Meyer, and Matz 2013; Mansour et al. 2016; Walker et al. 2019) by assessing statistics from BUSCO v5.2.2 in "transcriptome" mode referencing the metazoa\_odb10 gene set (Simão et al. 2015) (Table 3). The protein set produced from the final round of MAKER was annotated by identifying homologous sequences using BLASTp (Basic Local Alignment Search tool, e-value cut-off = 1e-5) against a hierarchical approach of the following databases: 1) UniProt-SwissProt (The UniProt Consortium 2017) 2) UniProt-TrEMBL (The UniProt Consortium 2017) and 3) the NCBI "nr" database. From the BLASTp searches, BLAST2GO (Conesa et al. 2005) was used to characterize putative gene functionality in addition to InterProScan (Jones et al. 2014).

### *Extraction of Total RNA*

Total RNA was extracted using the Duet DNA/RNA Miniprep Plus Kit (Zymo Research, Irvine, CA, USA, Cat #D7003) with modifications to the manufacturer's sample preparation



steps detailed here. Sterile clippers were used to remove ~1cm diameter region from the coral tissue. The tissue clipping was placed in 500 $\mu$ L of DNA/RNA shield (Zymo Cat #R1100-50) with 0.5mm glass beads (Fisher Scientific Cat #15-340-152) and homogenized by vortexing for 1 minute. The supernatant (450 $\mu$ l) was transferred to a new tube and centrifuged at 9000 rcf for 3 minutes to remove any debris. The supernatant (300 $\mu$ l) was mixed with 30 $\mu$ l of Proteinase K (Zymo Cat #D3001-2-20) digestion buffer and 15 $\mu$ l of Proteinase K in a new tube using a brief vortex step. Equal volume of Zymo lysis buffer (Zymo Cat #D7001-1-200) was added (345 $\mu$ l) and extraction was completed as outlined in the manufacturer's protocol. RNA concentration was quantified using the Qubit RNA Broad Range kit (Invitrogen Cat #Q10211) and integrity was assayed with an Agilent TapeStation 4200 system and the RNA Integrity Number (RIN) values ranged from 7.0-8.9. RNA libraries were prepared using the Zymo-Seq RiboFree Total RNA Library Kit (Zymo Cat #R3000) according to the manufacturer's instructions starting with 125ng of RNA as input. Prepared libraries were sent to Zymo Research Corporation for sequencing using the Illumina HiSeq for paired end sequencing (2x100bp).

### *RNASeq de novo Assembly and Genome Mapping*

Four paired-end Illumina libraries generated 35,505,857 raw read pairs. The raw RNA-seq data was quality checked by using fastQC v0.11.8 (Andrews and Others 2010) and visualized with MultiQC v1.7 (Ewels et al. 2016). Illumina adapters were removed and sequences with a phred score below 30 were trimmed using fastp v0.19.7 (Chen et al. 2018). After trimming, 85-93% of the data was kept across the four libraries and the trimmed reads were used for *de novo* assembly and was completed using Trinity v2.9.1 (Grabherr et al. 2011) using default parameters

except the fastq sequence type and CPU 20 parameters. The trimmed RNA-seq reads were also aligned to the *P. astreoides* genome using STAR v2.7.2b (Dobin et al. 2013).

## Results and Discussion

### *Genome Assembly Statistics*

The sequencing yielded just under 1,000,000 polymerase reads and a total polymerase read length of 20,188,576,450 (Table 1) from a single gDNA library. After quality control and assembly, we obtained a reference genome with a total size of ~678Mb (Table 2). This *P. astreoides* genome had comparable assembly statistics to three other *Porites* species, *P. rus* (Celis et al. 2018) (assembly size = 470Mbp), *P. lutea* (Robbins et al. 2019) (assembly size = 552Mbp) and *P. australiensis* (Shinzato et al. 2021) (assembly size = 576Mbp) (Table 2).

### *Genome Structural and Functional Annotation*

The initial round of MAKER predicted 58,308 putative gene models, the second round 68,481 gene models, and 64,636 were predicted gene models in the third and final round. From our final structural annotation, *P. astreoides* had an average of 4.9 exons per gene, a mean exon length of 190bp, and a mean intron length of 863. This is comparable to other *Porites* congeners as shown in (Table 2). Of the 64,636 protein encoding genes, 86.6% (n= 55,957) in total were annotated with 47.1% (n= 30,444) receiving hits from the SwissProt database, 37.7% (n= 24,359) from the TrEMBL database, and 1.8% (n= 1154) from the NCBI "nr" database. 13.4% (n= 8,679) had no hits to any of the databases. Through BLAST2GO (Conesa et al. 2005), 30,284 genes were assigned putative protein function against the SwissProt database, and 24,089 were assigned with InterProScan (Jones et al. 2014). After removal of duplicate gene functions,

67% (n=43154) had assigned protein functions using BLAST2GO (Conesa et al. 2005) and InterProScan (Jones et al. 2014).

### *Data Validation and Quality Control*

Genome assembly completeness was assessed by searching 954 universal metazoan single-copy orthologs in the metazoa\_odb10 gene set using BUSCO v5.2.2 (Simão et al. 2015). For the *P. astreoides* genome, 739 (77.5%) complete single-copy orthologs were identified, 128 (13.4%) orthologs were completed but duplicated, 39 (4.1%) orthologs were identified but fragmented, and 48 (5.0%) were missing. Compared to other *Porites* species, our *P. astreoides* assembly identified more complete single-copy orthologs than *P. rus* (Celis et al. 2018) (625 (65.5%) single-copy orthologs) but less than *P. lutea* (Robbins et al. 2019) (877 (91.9%) single-copy orthologs) and *P. australiensis* (Shinzato et al. 2021) (826 (86.6%) single-copy orthologs) (Table 2). The BUSCO analysis includes 13.4% duplication, which suggests the presence of haplotigs that were not fully removed in prior to or during the assembly process and should be addressed in future versions of the assembly.

To describe the mapping potential of the draft *P. astreoides* genome, four paired-end RNA-seq libraries were mapped to the *ab initio* reference genome using STAR v2.7.2b (Dobin et al. 2013). From the four RNA-seq libraries, mapping percentages ranged from 87.9% to 79.07%, with 17.9% to 17.05% of the reads mapping to multiple loci. This suggests that we have a suitable *ab initio* reference genome for RNA-seq data for Bermudian populations of *P. astreoides*.

Comparison of our *de novo* assembly statistics to those previously published (Table 3) indicates that all *de novo* assemblies to date suffer from transcript fragmentation or duplication in

comparison to the BUSCO metazoan reference set. For example, even in the *de novo* transcriptome by Walker et al. (2019) with the highest complete and single copy BUSCO score and the lowest number of missing reference genes, the values are still only 26.5% complete and single copy and 15.3% remain missing.

While it is possible that there is insufficient gene model prediction in our draft assembly, the high number of gene models is likely to be a result of duplicated contigs from different haplotypes and a fragmented assembly, which is also seen currently in the *de novo* transcriptome. This issue of high predicted gene model number in *P. astreoides* should be improved in subsequent draft assemblies by purging haplotigs and the use of combined short read sequence data with our PacBio scaffolds. Here we have generated a valuable resource for the community that can now be improved through an iterative process through the coral research community investment.

### *Reuse Potential*

Due to the ecological increase in relative abundance of *P. astreoides* in the Atlantic (Green, Edmunds, and Carpenter 2008), it is crucial to understand the mechanisms leading to resilience under predicted climate change conditions. Given the potential to improve current transcriptomes (Kenkel, Meyer, and Matz 2013; Mansour et al. 2016; Walker et al. 2019) and the lack of genomic resources for this species, we provide the first draft reference genome for *P. astreoides*. Although we acknowledge this genome can and should be improved, the goal was to provide a community resource for the advancement of molecular biology and comparative genomics of reef-building corals. *P. astreoides* and the genus *Porites* in general is known to be a challenging coral species for molecular biology approaches. *Porites* species have high mucus

(Johnston and Rohwer 2007) and lipid (Grottoli, Rodrigues, and Juarez 2004; Teece et al. 2011) content, thick tissues (Yost et al. 2013; Putnam et al. 2017), and high endosymbiont densities (Thornhill et al. 2011), which can create complications for DNA and RNA extractions and retain molecules that act as inhibitors in PCR, and thus often result in poor quality library preparation and *de novo* transcriptome assemblies. The *ab initio* reference genome, transcriptome, and updated annotations generated by this study therefore have the potential to serve as a useful resource to the coral field and marine invertebrate community more broadly.

#### *Availability of supporting data and source code*

The genome assembly and all raw sequencing reads including the PacBio HiFi reads and Illumina RNA-seq, annotations, alignments, and other results are available via Open Science Framework Repository DOI 10.17605/OSF.IO/ED8XU (<https://osf.io/ed8xu/>).

#### **List of abbreviations**

DNA = Deoxyribonucleic acid, RNA = Ribonucleic acid, gDNA = Genomic DNA, PCR = Polymerase Chain Reaction, BLAST = Basic Local Alignment Search Tool, bp = base pair, Gbp = gigabase pair, Mbp = megabase pair, kbp = kilobase pair, HMW = high molecular weight; BUSCO = Benchmarking Universal Single-Copy Orthologs, NCBI = National Center for Biotechnology Information

#### **Ethical Approval**

Corals were collected under permit 17060807 from the Government of Bermuda Department of Environment and Natural Resources and exported with CITES permit number 19BM0011.

### **Competing Interests**

The author(s) declare that they have no competing interests.

### **Funding**

University of Rhode Island's Committee for Research and Creative Activities Research Proposal Development Grant grant 2017-2018, Heising-Simons Foundation to BIOS and URI subaward.

### **Author's Contributions**

Conceptualization: HMP, Methodology HMP, KHW; Investigation: KHW, HMP; Formal analysis: KHW; Resources: HMP; Data Curation: KHW, HMP; Writing Original Draft: KHW, HMP; Writing Review & Editing: KHW, HMP; Visualization: KHW; Supervision: HMP; Funding acquisition: HMP

### **Acknowledgements**

We would like to acknowledge the Bermuda Institute of Ocean Sciences facilities, Heising-Simons Foundation International, LTD, Natural Sciences and Engineering Research Council of Canada Post Graduate Scholarship Doctoral (NSERC PGSD3 Award #545967-2020), University of Rhode Island High Performance Computing, and the Canadian Associates of the

Bermuda Institute of Ocean Sciences for their logistical and financial support of this work.

Additionally, we would like to thank Dr. Samantha de Putron, Dr. Gretchen Goodbody-Gringley and Alexander Chequer for field assistance, Margaret Schedl for laboratory assistance and Kevin Bryan at the University of Rhode Island High Performance Computing for his assistance with computational needs.

## Tables

Table 1. Contig length and assembly statistics.

| Statistics                 | Filtered Assembly | Unfiltered Assembly |
|----------------------------|-------------------|---------------------|
| No. contigs                | 3,051             | 3,095               |
| No. contigs (>= 0 bp)      | 3,051             | 3,095               |
| No. contigs (>= 1000 bp)   | 3,051             | 3,095               |
| No. contigs (>= 5000 bp)   | 3,048             | 3,093               |
| No. contigs (>= 10000 bp)  | 3,030             | 3,070               |
| No. contigs (>= 25000 bp)  | 2,866             | 2,905               |
| No. contigs (>= 50000 bp)  | 2,429             | 2,432               |
| Largest contig (bp)        | 3,369,715         | 2,514,820           |
| Total length (bp)          | 677,753,397       | 680,005,989         |
| Total length (>= 0 bp)     | 677,753,397       | 680,005,989         |
| Total length (>= 1000 bp)  | 677,753,397       | 680,005,989         |
| Total length (>= 5000 bp)  | 677,742,019       | 679,999,105         |
| Total length (>= 10000 bp) | 677,611,785       | 679,826,819         |
| Total length (>= 25000 bp) | 674,350,533       | 676,554,116         |
| Total length (>= 50000 bp) | 658,123,657       | 658,911,805         |
| N50                        | 412,256           | 408,687             |
| N75                        | 189,769           | 190,323             |
| L50                        | 437               | 444                 |
| L75                        | 1,049             | 1,055               |
| GC (%)                     | 39.12%            | 39.14%              |

Table 2. Comparison of genome assembly and annotation metrics of *Porites* congeners.

| Feature                                           | <i>Porites rus</i> | <i>Porites lutea</i> | <i>Porites australiensis</i> | <i>Porites astreoides</i> |
|---------------------------------------------------|--------------------|----------------------|------------------------------|---------------------------|
| Study                                             | [61]               | [57]                 | [62]                         | This Study                |
| Assembly size (Mbp)                               | 470                | 552                  | 576                          | 678                       |
| No. protein coding genes                          | 39,453             | 31,126               | 30,301                       | 64,636                    |
| Mean no. of exons per gene                        | 5.3                | 6.6                  | 7.6                          | 4.9                       |
| Mean exon length (bp)                             | 239                | 275                  | 346                          | 190                       |
| Mean intron length (bp)                           | 1224               | 1146                 | 1190                         | 863                       |
| Metazoan BUSCOs (%(gene number), total=954 genes) |                    |                      |                              |                           |
| Complete single-copy                              | 65.5 (625)         | 91.9 (877)           | 86.6 (826)                   | 77.5 (739)                |
| Complete duplicated                               | 2.3 (22)           | 1.8 (17)             | 3.1 (30)                     | 13.4 (128)                |
| Fragmented                                        | 18.7 (178)         | 2.8 (27)             | 5.8 (55)                     | 4.1 (39)                  |
| Missing                                           | 13.5 (129)         | 3.5 (33)             | 4.5 (43)                     | 5.0 (48)                  |

Table 3. Comparison of BUSCO metrics of transcriptome completeness across *Porites astreoides* transcriptome assemblies relative to the BUSCO metazoa\_odb10 gene set. Transcript quantification was conducted on isogroups using custom scripts for studies with a single asterisk (\*) and on transcripts via Trinity for studies indicated with double asterisks (\*\*).

| Metazoan BUSCOs<br>%(gene number),<br>total=954 genes | Kenkel et al. 2013 | Mansour et al. 2016 | Walker et al. 2019 | Wong and Putnam 2022 |
|-------------------------------------------------------|--------------------|---------------------|--------------------|----------------------|
| Study                                                 | [32]               | [55]                | [34]               | This Study           |
| Transcripts                                           | 31,663*            | 129,718**           | 918,990**          | 687,749**            |
| Complete single-copy                                  | 22.2 (219)         | 18.1 (173)          | 26.5 (253)         | 13.9 (133)           |
| Complete duplicated                                   | 0.7 (7)            | 12.2 (116)          | 36.6 (349)         | 7.5 (72)             |
| Fragmented                                            | 31.1 (297)         | 4.9 (47)            | 21.6 (206)         | 36.7 (350)           |
| Missing                                               | 46.0 (438)         | 64.8 (618)          | 15.3 (146)         | 41.9 (399)           |

## Figures

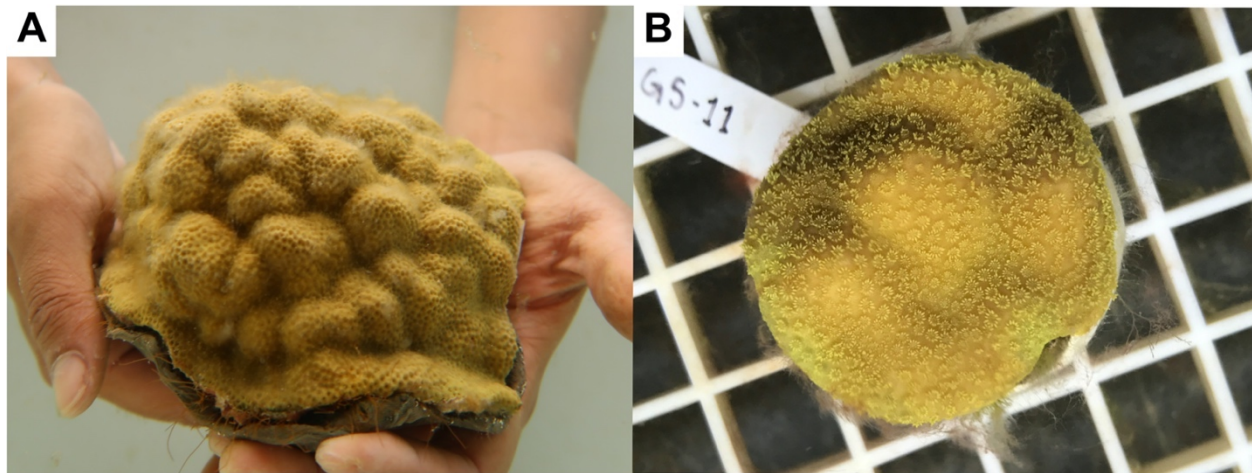

Figure 1. A) Colony of *P. astreoides* and B) replicate fragment cores used for exposures and extractions.



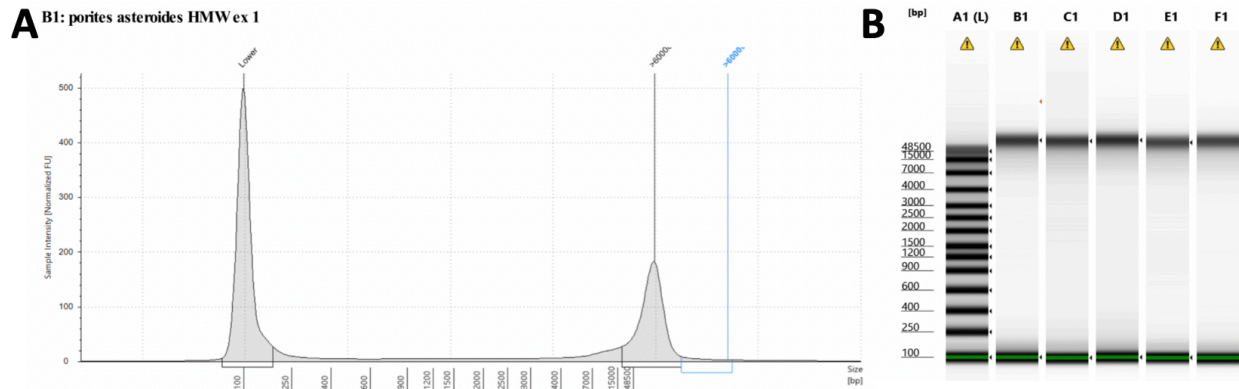

Figure 2. Quality check of HMW DNA extracted and used for SMRTbell library preparation indicates A) large size fragments as shown by the TapeStation peak view and B) high molecular weight across all extractions.

## References

- Albright, R., B. Mason, and C. Langdon. 2008. "Effect of Aragonite Saturation State on Settlement and Post-Settlement Growth of *Porites Astreoides* Larvae." *Coral Reefs* 27 (3): 485–90.
- Andrews, Simon, and Others. 2010. "FastQC: A Quality Control Tool for High Throughput Sequence Data." Babraham Bioinformatics, Babraham Institute, Cambridge, United Kingdom.
- Bove, Colleen B., Justin B. Ries, Sarah W. Davies, Isaac T. Westfield, James Umbanhowar, and Karl D. Castillo. 2019. "Common Caribbean Corals Exhibit Highly Variable Responses to Future Acidification and Warming." *Proceedings. Biological Sciences / The Royal Society* 286 (1900): 20182840.
- Cantarel, Brandi L., Ian Korf, Sofia M. C. Robb, Genis Parra, Eric Ross, Barry Moore, Carson Holt, Alejandro Sánchez Alvarado, and Mark Yandell. 2008. "MAKER: An Easy-to-Use

Annotation Pipeline Designed for Emerging Model Organism Genomes.” *Genome Research*. <https://doi.org/10.1101/gr.6743907>.

Celis, Juan Sebastián, Daniel Wibberg, Catalina Ramírez-Portilla, Oliver Rupp, Alexander Sczyrba, Anika Winkler, Jörn Kalinowski, and Thomas Wilke. 2018. “Binning Enables Efficient Host Genome Reconstruction in Cnidarian Holobionts.” *GigaScience*. <https://doi.org/10.1093/gigascience/giy075>.

Chapron, Leila, Verena Schoepf, Stephen J. Levas, Matthew D. Aschaffenburg, Mark E. Warner, and Andréa G. Grottoli. 2022. “Natural Variability in Caribbean Coral Physiology and Implications for Coral Bleaching Resilience.” *Frontiers in Marine Science* 8. <https://doi.org/10.3389/fmars.2021.811055>.

Chen, Nansheng. 2004. “Using Repeat Masker to Identify Repetitive Elements in Genomic Sequences.” *Current Protocols in Bioinformatics*. <https://doi.org/10.1002/0471250953.bi0410s05>.

Chen, Shifu, Yanqing Zhou, Yaru Chen, and Jia Gu. 2018. “Fastp: An Ultra-Fast All-in-One FASTQ Preprocessor.” *Bioinformatics*. <https://doi.org/10.1093/bioinformatics/bty560>.

Chin, Chen-Shan, Paul Peluso, Fritz J. Sedlazeck, Maria Nattestad, Gregory T. Concepcion, Alicia Clum, Christopher Dunn, et al. 2016. “Phased Diploid Genome Assembly with Single-Molecule Real-Time Sequencing.” *Nature Methods*. <https://doi.org/10.1038/nmeth.4035>.

Chornesky, Elizabeth A., and Esther C. Peters. 1987. “SEXUAL REPRODUCTION AND COLONY GROWTH IN THE SCLERACTINIAN CORAL PORITES ASTREOIDES.” *The Biological Bulletin* 172 (2): 161–77.

Coles, S. L., and Barbara E. Brown. 2003. “Coral Bleaching — Capacity for Acclimatization and

- Adaptation.” In *Advances in Marine Biology*, 46:183–223. Academic Press.
- Conesa, A., S. Gotz, J. M. Garcia-Gomez, J. Terol, M. Talon, and M. Robles. 2005. “Blast2GO: A Universal Tool for Annotation, Visualization and Analysis in Functional Genomics Research.” *Bioinformatics*. <https://doi.org/10.1093/bioinformatics/bti610>.
- Darling, Emily S., Lorenzo Alvarez-Filip, Thomas A. Oliver, Timothy R. McClanahan, Isabelle M. Côté, and David Bellwood. 2012. “Evaluating Life-History Strategies of Reef Corals from Species Traits.” *Ecology Letters* 15 (12): 1378–86.
- Dimond, James L., and Steven B. Roberts. 2020. “Convergence of DNA Methylation Profiles of the Reef Coral *Porites Astreoides* in a Novel Environment.” *Frontiers in Marine Science*. <https://doi.org/10.3389/fmars.2019.00792>.
- Dobin, Alexander, Carrie A. Davis, Felix Schlesinger, Jorg Drenkow, Chris Zaleski, Sonali Jha, Philippe Batut, Mark Chaisson, and Thomas R. Gingeras. 2013. “STAR: Ultrafast Universal RNA-Seq Aligner.” *Bioinformatics*. <https://doi.org/10.1093/bioinformatics/bts635>.
- Dodge, Richard E., Alan Logan, and Arnfried Antonius. 1982. “Quantitative Reef Assessment Studies in Bermuda: A Comparison of Methods and Preliminary Results.” *Bulletin of Marine Science* 32 (3): 745–60.
- Dunphy, Courtney M., Steven V. Vollmer, and Tarik C. Gouhier. 2021. “Host–microbial Systems as Glass Cannons: Explaining Microbiome Stability in Corals Exposed to Extrinsic Perturbations.” *Journal of Animal Ecology*. <https://doi.org/10.1111/1365-2656.13466>.
- Eagleson, Ryan G., John S. Lumsden, Lorenzo Álvarez-Filip, Christophe M. Herbinger, and Ryan A. Horricks. 2021. “Coverage Increases of *Porites Astreoides* in Grenada Determined by Shifts in Size-Frequency Distribution.” *Diversity* 13 (7): 288.
- Edmunds, Peter J., Craig Didden, and Karl Frank. 2021. “Over Three Decades, a Classic Winner

Starts to Lose in a Caribbean Coral Community.” *Ecosphere* 12 (5).

<https://doi.org/10.1002/ecs2.3517>.

Edmunds, Peter J., Ruth D. Gates, William Leggat, Ove Hoegh-Guldberg, and Laurie Allen-

Requa. 2005. “The Effect of Temperature on the Size and Population Density of

Dinoflagellates in Larvae of the Reef Coral *Porites Astreoides*.” *Invertebrate Biology: A*

*Quarterly Journal of the American Microscopical Society and the Division of Invertebrate*

*Zoology/ASZ* 124 (3): 185–93.

Edmunds, P., R. Gates, and D. Gleason. 2001. “The Biology of Larvae from the Reef Coral

*Porites Astreoides*, and Their Response to Temperature Disturbances.” *Marine Biology* 139

(5): 981–89.

Elizalde-Rendón, E. M., G. Horta-Puga, P. González-Díaz, and J. P. Carricart-Ganivet. 2010.

“Growth Characteristics of the Reef-Building Coral *Porites Astreoides* under Different

Environmental Conditions in the Western Atlantic.” *Coral Reefs* 29 (3): 607–14.

Ewels, Philip, Måns Magnusson, Sverker Lundin, and Max Källner. 2016. “MultiQC: Summarize

Analysis Results for Multiple Tools and Samples in a Single Report.” *Bioinformatics* 32

(19): 3047–48.

Fuess, Lauren E., Jorge H. Pinzón C, Ernesto Weil, Robert D. Grinshpon, and Laura D. Mydlarz.

2017. “Life or Death: Disease-Tolerant Coral Species Activate Autophagy Following

Immune Challenge.” *Proceedings of the Royal Society B: Biological Sciences*.

<https://doi.org/10.1098/rspb.2017.0771>.

Gallery, Dominique N., Michelle L. Green, Ilsa B. Kuffner, Elizabeth A. Lenz, and Lauren T.

Toth. 2021. “Genetic Structure and Diversity of the Mustard Hill Coral *Porites Astreoides*

along the Florida Keys Reef Tract.” *Marine Biodiversity: A Journal of the Senckenberg*

*Research Institute / Senckenberg Forschungsinstitut Und Naturmudeum* 51 (4): 63.

Glasl, Bettina, Gerhard J. Herndl, and Pedro R. Frade. 2016. “The Microbiome of Coral Surface Mucus Has a Key Role in Mediating Holobiont Health and Survival upon Disturbance.” *The ISME Journal* 10 (9): 2280–92.

Goodbody-Gringley, Gretchen, Federica Scucchia, Rebecca Ju, Alex Chequer, Shai Einbinder, Stephane Martinez, Hagai Nativ, and Tali Mass. 2021. “Plasticity of *Porites Astreoides* Early Life History Stages Suggests Mesophotic Coral Ecosystems Act as Refugia in Bermuda.” *Frontiers in Marine Science* 8. <https://doi.org/10.3389/fmars.2021.702672>.

Goodbody-Gringley, Gretchen, Kevin H. Wong, Danielle M. Becker, Keegan Glennon, and Samantha J. De Putron. 2018. “Reproductive Ecology and Early Life History Traits of the Brooding Coral, *Porites Astreoides*, from Shallow to Mesophotic Zones.” *Coral Reefs* 37 (2): 483–94.

Grabherr, Manfred G., Brian J. Haas, Moran Yassour, Joshua Z. Levin, Dawn A. Thompson, Ido Amit, Xian Adiconis, et al. 2011. “Full-Length Transcriptome Assembly from RNA-Seq Data without a Reference Genome.” *Nature Biotechnology*. <https://doi.org/10.1038/nbt.1883>.

Green, D. H., P. J. Edmunds, and R. C. Carpenter. 2008. “Increasing Relative Abundance of *Porites Astreoides* on Caribbean Reefs Mediated by an Overall Decline in Coral Cover.” *Marine Ecology Progress Series* 359 (May): 1–10.

Grottoli, A. G., L. J. Rodrigues, and C. Juarez. 2004. “Lipids and Stable Carbon Isotopes in Two Species of Hawaiian Corals, *Porites Compressa* and *Montipora Verrucosa*, Following a Bleaching Event.” *Marine Biology*. <https://doi.org/10.1007/s00227-004-1337-3>.

Grottoli, Andréa G., Mark E. Warner, Stephen J. Levas, Matthew D. Aschaffenburg, Verena

- Schoepf, Michael McGinley, Justin Baumann, and Yohei Matsui. 2014. “The Cumulative Impact of Annual Coral Bleaching Can Turn Some Coral Species Winners into Losers.” *Global Change Biology*. <https://doi.org/10.1111/gcb.12658>.
- Haslun, Joshua A., Briana Hauff-Salas, Kevin B. Strychar, Nathaniel E. Ostrom, and James M. Cervino. 2018. “Biotic Stress Contributes to Seawater Temperature Induced Stress in a Site-Specific Manner for *Porites Astreoides*.” *Marine Biology* 165 (10). <https://doi.org/10.1007/s00227-018-3414-z>.
- Hughes, Terry P., Kristen D. Anderson, Sean R. Connolly, Scott F. Heron, James T. Kerry, Janice M. Lough, Andrew H. Baird, et al. 2018. “Spatial and Temporal Patterns of Mass Bleaching of Corals in the Anthropocene.” *Science* 359 (6371): 80–83.
- Hughes, Terry P., James T. Kerry, Sean R. Connolly, Jorge G. Álvarez-Romero, C. Mark Eakin, Scott F. Heron, Migdonio A. Gonzalez, and Joanne Moneghetti. 2021. “Emergent Properties in the Responses of Tropical Corals to Recurrent Climate Extremes.” *Current Biology: CB* 31 (23): 5393–99.e3.
- Johnston, I. S., and F. Rohwer. 2007. “Microbial Landscapes on the Outer Tissue Surfaces of the Reef-Building Coral *Porites Compressa*.” *Coral Reefs*. <https://doi.org/10.1007/s00338-007-0208-z>.
- Jones, P., D. Binns, H-Y Chang, M. Fraser, W. Li, C. McAnulla, H. McWilliam, et al. 2014. “InterProScan 5: Genome-Scale Protein Function Classification.” *Bioinformatics*. <https://doi.org/10.1093/bioinformatics/btu031>.
- Kenkel, C. D., G. Goodbody-Gringley, D. Caillaud, S. W. Davies, E. Bartels, and M. V. Matz. 2013. “Evidence for a Host Role in Thermotolerance Divergence between Populations of the Mustard Hill Coral (*Porites Astreoides*) from Different Reef Environments.” *Molecular*

*Ecology* 22 (16): 4335–48.

Kenkel, C. D., E. Meyer, and M. V. Matz. 2013. “Gene Expression under Chronic Heat Stress in Populations of the Mustard Hill Coral (*Porites Astreoides*) from Different Thermal Environments.” *Molecular Ecology* 22 (16): 4322–34.

Kenkel, C. D., S. P. Setta, and M. V. Matz. 2015. “Heritable Differences in Fitness-Related Traits among Populations of the Mustard Hill Coral, *Porites Astreoides*.” *Heredity* 115 (6): 509–16.

Korf, Ian. 2004. “BMC Bioinformatics.” <https://doi.org/10.1186/1471-2105-5-59>.

LaJeunesse, Todd C., John Everett Parkinson, Paul W. Gabrielson, Hae Jin Jeong, James Davis Reimer, Christian R. Voolstra, and Scott R. Santos. 2018. “Systematic Revision of Symbiodiniaceae Highlights the Antiquity and Diversity of Coral Endosymbionts.” *Current Biology: CB* 28 (16): 2570–80.e6.

Lenz, Elizabeth Ann, Lucy A. Bartlett, Anastasios Stathakopoulos, and Ilsa B. Kuffner. 2021. “Physiological Differences in Bleaching Response of the Coral *Porites Astreoides* Along the Florida Keys Reef Tract During High-Temperature Stress.” *Frontiers in Marine Science* 8. <https://doi.org/10.3389/fmars.2021.615795>.

Levas, Stephen, Verena Schoepf, Mark E. Warner, Matthew Aschaffenburg, Justin Baumann, and Andréa G. Grottoli. 2018. “Long-Term Recovery of Caribbean Corals from Bleaching.” *Journal of Experimental Marine Biology and Ecology* 506 (September): 124–34.

Li, Heng. 2018. “Minimap2: Pairwise Alignment for Nucleotide Sequences.” *Bioinformatics*. <https://doi.org/10.1093/bioinformatics/bty191>.

Li, H., B. Handsaker, A. Wysoker, T. Fennell, J. Ruan, N. Homer, G. Marth, G. Abecasis, R. Durbin, and 1000 Genome Project Data Processing Subgroup. 2009. “The Sequence

Alignment/Map Format and SAMtools.” *Bioinformatics*.

<https://doi.org/10.1093/bioinformatics/btp352>.

Lord, Karina Scavo, Anna Barcala, Hannah E. Aichelman, Nicola G. Kriefall, Chloe Brown,

Lauren Knasin, Riley Secor, Cailey Tone, Laura Tsang, and John R. Finnerty. 2021.

“Distinct Phenotypes Associated with Mangrove and Lagoon Habitats in Two Widespread Caribbean Corals, *Porites Astreoides* and *Porites Divaricata*.” *The Biological Bulletin* 240 (3): 169–90.

Loya, Y., K. Sakai, K. Yamazato, Y. Nakano, H. Sambali, and R. van Woesik. 2001. “Coral Bleaching: The Winners and the Losers.” *Ecology Letters* 4 (2): 122–31.

Mansour, Tamer A., Joshua J. C. Rosenthal, C. Titus Brown, and Loretta M. Roberson. 2016.

“Transcriptome of the Caribbean Stony Coral *Porites Astreoides* from Three Developmental Stages.” *GigaScience*. <https://doi.org/10.1186/s13742-016-0138-1>.

McGuire, M. P. 1998. “Timing of Larval Release by *Porites Astreoides* in the Northern Florida Keys.” *Coral Reefs* 17 (4): 369–75.

Meiling, Sonora S., Erinn M. Muller, Danielle Lasseigne, Ashley Rossin, Alex J. Veglia,

Nicholas MacKnight, Bradford Dimos, et al. 2021. “Variable Species Responses to Experimental Stony Coral Tissue Loss Disease (SCTLD) Exposure.” *Frontiers in Marine Science*. <https://doi.org/10.3389/fmars.2021.670829>.

Meyer, Julie L., Valerie J. Paul, and Max Teplitski. 2014. “Community Shifts in the Surface

Microbiomes of the Coral *Porites Astreoides* with Unusual Lesions.” *PLoS ONE*.

<https://doi.org/10.1371/journal.pone.0100316>.

Muscatine, Leonard, and Elsa Cernichiari. 1969. “ASSIMILATION OF PHOTOSYNTHETIC

PRODUCTS OF ZOOXANTHELLAE BY A REEF CORAL.” *The Biological Bulletin* 137



(3): 506–23.

- Olsen, K., R. Ritson-Williams, J. D. Ochriotor, V. J. Paul, and C. Ross. 2013. “Detecting Hyperthermal Stress in Larvae of the Hermatypic Coral *Porites Astreoides*: The Suitability of Using Biomarkers of Oxidative Stress versus Heat-Shock Protein Transcriptional Expression.” *Marine Biology* 160 (10): 2609–18.
- Pereira, N. S., A. N. Sial, R. Frei, C. V. Ullmann, C. Korte, R. K. P. Kikuchi, V. P. Ferreira, and K. H. Kilbourne. 2017. “The Potential of the Coral Species *Porites Astreoides* as a Paleoclimate Archive for the Tropical South Atlantic Ocean.” *Journal of South American Earth Sciences* 77 (August): 276–85.
- Putnam, Hollie M., Katie L. Barott, Tracy D. Ainsworth, and Ruth D. Gates. 2017. “The Vulnerability and Resilience of Reef-Building Corals.” *Current Biology: CB* 27 (11): R528–40.
- Putron, Samantha J. de, Samantha J. de Putron, Julia M. Lawson, Kascia Q. L. White, Matthew T. Costa, Miriam V. B. Geronimus, and Anne MacCarthy. 2017. “Variation in Larval Properties of the Atlantic Brooding Coral *Porites Astreoides* between Different Reef Sites in Bermuda.” *Coral Reefs*. <https://doi.org/10.1007/s00338-016-1527-8>.
- Putron, S. J. de, D. C. McCorkle, A. L. Cohen, and A. B. Dillon. 2011. “The Impact of Seawater Saturation State and Bicarbonate Ion Concentration on Calcification by New Recruits of Two Atlantic Corals.” *Coral Reefs* 30 (2): 321–28.
- Putron, S. J. de, and S. R. Smith. 2011. “Planula Release and Reproductive Seasonality of the Scleractinian Coral *Porites Astreoides* in Bermuda, a High-Latitude Reef.” *Bulletin of Marine Science* 87 (1): 75–90.
- Reich, Hannah G., Deborah L. Robertson, and Gretchen Goodbody-Gringley. 2017. “Do the

Shuffle: Changes in Symbiodinium Consortia throughout Juvenile Coral Development.”

*PloS One* 12 (2): e0171768.

Riquet, Florentine, Aurélien Japaud, Flávia L. D. Nunes, Xaymara M. Serrano, Andrew C.

Baker, Etienne Bezault, Claude Bouchon, and Cécile Fauvelot. 2022. “Complex Spatial Patterns of Genetic Differentiation in the Caribbean Mustard Hill Coral *Porites Astreoides*.”

*Coral Reefs*. <https://doi.org/10.1007/s00338-021-02157-z>.

Robbins, Steven J., Caitlin M. Singleton, Cheong Xin Chan, Lauren F. Messer, Aileen U. Geers,

Hua Ying, Alexander Baker, et al. 2019. “A Genomic View of the Reef-Building Coral *Porites Lutea* and Its Microbial Symbionts.” *Nature Microbiology*.

<https://doi.org/10.1038/s41564-019-0532-4>.

Ross, C., R. Ritson-Williams, K. Olsen, and V. J. Paul. 2013. “Short-Term and Latent Post-

Settlement Effects Associated with Elevated Temperature and Oxidative Stress on Larvae from the Coral *Porites Astreoides*.” *Coral Reefs* 32 (1): 71–79.

Salas, Briana Hauff, Joshua A. Haslun, Kevin B. Strychar, Peggy H. Ostrom, and James M.

Cervino. 2017. “Site-Specific Variation in Gene Expression from *Symbiodinium* Spp.

Associated with Offshore and Inshore *Porites Astreoides* in the Lower Florida Keys Is Lost with Bleaching and Disease Stress.” *PLOS ONE*.

<https://doi.org/10.1371/journal.pone.0173350>.

Schoepf, Verena, Andréa G. Grottoli, Stephen J. Levas, Matthew D. Aschaffenburg, Justin H.

Baumann, Yohei Matsui, and Mark E. Warner. 2015. “Annual Coral Bleaching and the Long-Term Recovery Capacity of Coral.” *Proceedings. Biological Sciences / The Royal Society* 282 (1819). <https://doi.org/10.1098/rspb.2015.1887>.

Serrano, Xaymara M., Iliana B. Baums, Tyler B. Smith, Ross J. Jones, Tonya L. Shearer, and

- Andrew C. Baker. 2016. “Long Distance Dispersal and Vertical Gene Flow in the Caribbean Brooding Coral *Porites Astreoides*.” *Scientific Reports*.  
<https://doi.org/10.1038/srep21619>.
- Sharp, Koty H., Dan Distel, and Valerie J. Paul. 2012. “Diversity and Dynamics of Bacterial Communities in Early Life Stages of the Caribbean Coral *Porites Astreoides*.” *The ISME Journal* 6 (4): 790–801.
- Shinzato, Chuya, Takeshi Takeuchi, Yuki Yoshioka, Ipputa Tada, Miyuki Kanda, Cédric Broussard, Akira Iguchi, et al. 2021. “Whole-Genome Sequencing Highlights Conservative Genomic Strategies of a Stress-Tolerant, Long-Lived Scleractinian Coral, *Porites Australiensis* Vaughan, 1918.” *Genome Biology and Evolution*.  
<https://doi.org/10.1093/gbe/evab270>.
- Simão, Felipe A., Robert M. Waterhouse, Panagiotis Ioannidis, Evgenia V. Kriventseva, and Evgeny M. Zdobnov. 2015. “BUSCO: Assessing Genome Assembly and Annotation Completeness with Single-Copy Orthologs.” *Bioinformatics*.  
<https://doi.org/10.1093/bioinformatics/btv351>.
- Stanke, M., O. Keller, I. Gunduz, A. Hayes, S. Waack, and B. Morgenstern. 2006. “AUGUSTUS: Ab Initio Prediction of Alternative Transcripts.” *Nucleic Acids Research*.  
<https://doi.org/10.1093/nar/gkl200>.
- Teece, Mark A., Benjamin Estes, Eric Gelsleichter, and Diego Lirman. 2011. “Heterotrophic and Autotrophic Assimilation of Fatty Acids by Two Scleractinian Corals, *Montastraea Faveolata* and *Porites Astreoides*.” *Limnology and Oceanography*.  
<https://doi.org/10.4319/lo.2011.56.4.1285>.
- The UniProt Consortium. 2017. “UniProt: The Universal Protein Knowledgebase.” *Nucleic*

*Acids Research* 45 (D1): D158–69.

Thornhill, Daniel J., Randi D. Rotjan, Brian D. Todd, Geoff C. Chilcoat, Roberto Iglesias-Prieto,

Dustin W. Kemp, Todd C. LaJeunesse, et al. 2011. “A Connection between Colony

Biomass and Death in Caribbean Reef-Building Corals.” *PLoS ONE*.

<https://doi.org/10.1371/journal.pone.0029535>.

Thurber, Rebecca Vega, Deron E. Burkepile, Adrienne M. S. Correa, Andrew R. Thurber,

Andrew A. Shantz, Rory Welsh, Catharine Pritchard, and Stephanie Rosales. 2012.

“Macroalgae Decrease Growth and Alter Microbial Community Structure of the Reef-Building Coral, *Porites Astreoides*.” *PLoS ONE*.

<https://doi.org/10.1371/journal.pone.0044246>.

Toth, L. T., A. Stathakopoulos, I. B. Kuffner, R. R. Ruzicka, M. A. Colella, and E. A. Shinn.

2019. “The Unprecedented Loss of Florida’s Reef-Building Corals and the Emergence of a Novel Coral-Reef Assemblage.” *Ecology* 100 (9): e02781.

Vermeij, Mark J. A., Judith Bakker, Noam van der Hal, and Rolf P. M. Bak. 2011. “Juvenile

Coral Abundance Has Decreased by More Than 50% in Only Three Decades on a Small Caribbean Island.” *Diversity* 3 (3): 296–307.

Walker, Nia S., Rosa Fernández, Jennifer M. Sneed, Valerie J. Paul, Gonzalo Giribet, and David

J. Combosch. 2019. “Differential Gene Expression during Substrate Probing in Larvae of the Caribbean Coral *Porites Astreoides*.” *Molecular Ecology* 28 (22): 4899–4913.

Wegley, Linda, Robert Edwards, Beltran Rodriguez-Brito, Hong Liu, and Forest Rohwer. 2007.

“Metagenomic Analysis of the Microbial Community Associated with the Coral *Porites Astreoides*.” *Environmental Microbiology*. [https://doi.org/10.1111/j.1462-](https://doi.org/10.1111/j.1462-2920.2007.01383.x)

[2920.2007.01383.x](https://doi.org/10.1111/j.1462-2920.2007.01383.x).

- Wong, Kevin H., Gretchen Goodbody-Gringley, Samantha J. de Putron, Danielle M. Becker, Alex Chequer, and Hollie M. Putnam. 2021. “Brooded Coral Offspring Physiology Depends on the Combined Effects of Parental Press and Pulse Thermal History.” *Global Change Biology* 27 (13): 3179–95.
- Yost, Denise M., Li-Hsueh Wang, Tung-Yung Fan, Chii-Shiang Chen, Raymond W. Lee, Emilia Sogin, and Ruth D. Gates. 2013. “Diversity in Skeletal Architecture Influences Biological Heterogeneity and Symbiodinium Habitat in Corals.” *Zoology*.  
<https://doi.org/10.1016/j.zool.2013.06.001>.
- Zhang, Yingqi, Wyatt C. Million, Maria Ruggeri, and Carly D. Kenkel. 2019. “Family Matters: Variation in the Physiology of Brooded *Porites Astreoides* Larvae Is Driven by Parent Colony Effects.” *Comparative Biochemistry and Physiology. Part A, Molecular & Integrative Physiology* 238 (December): 110562.
